# Supplementary material
Source: PubMed Central journal article supplement (PMC1283796)

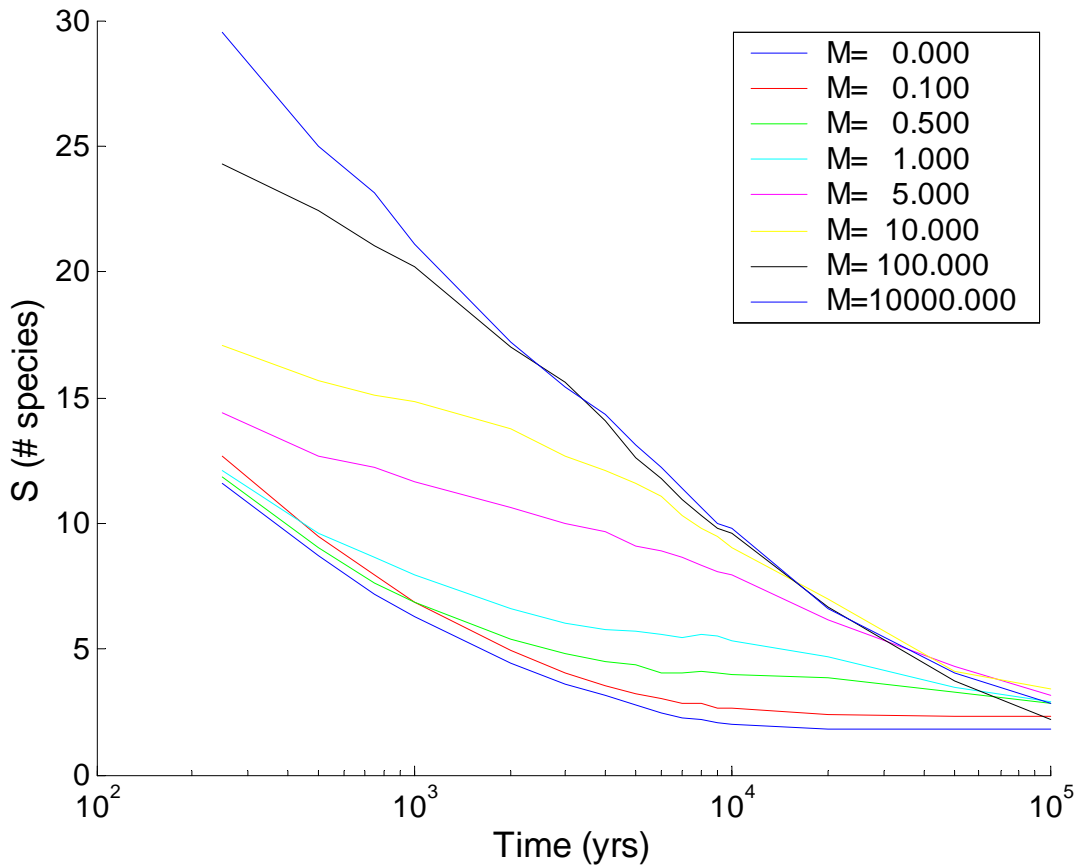

Supplement: pnas_0504225102_1.pdf [file pnas_0504225102_1.pdf]

# vs space

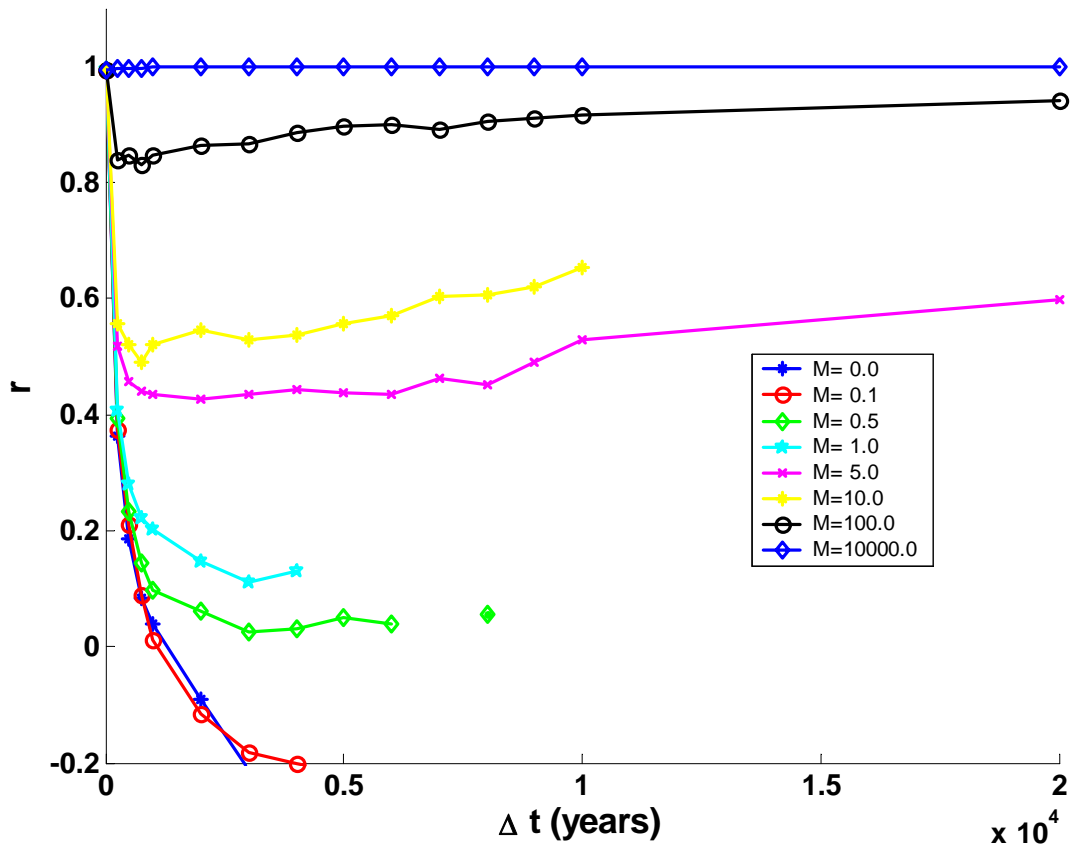

Supplement: pnas_0504225102_2.pdf [file pnas_0504225102_2.pdf]

# Site vs. itself

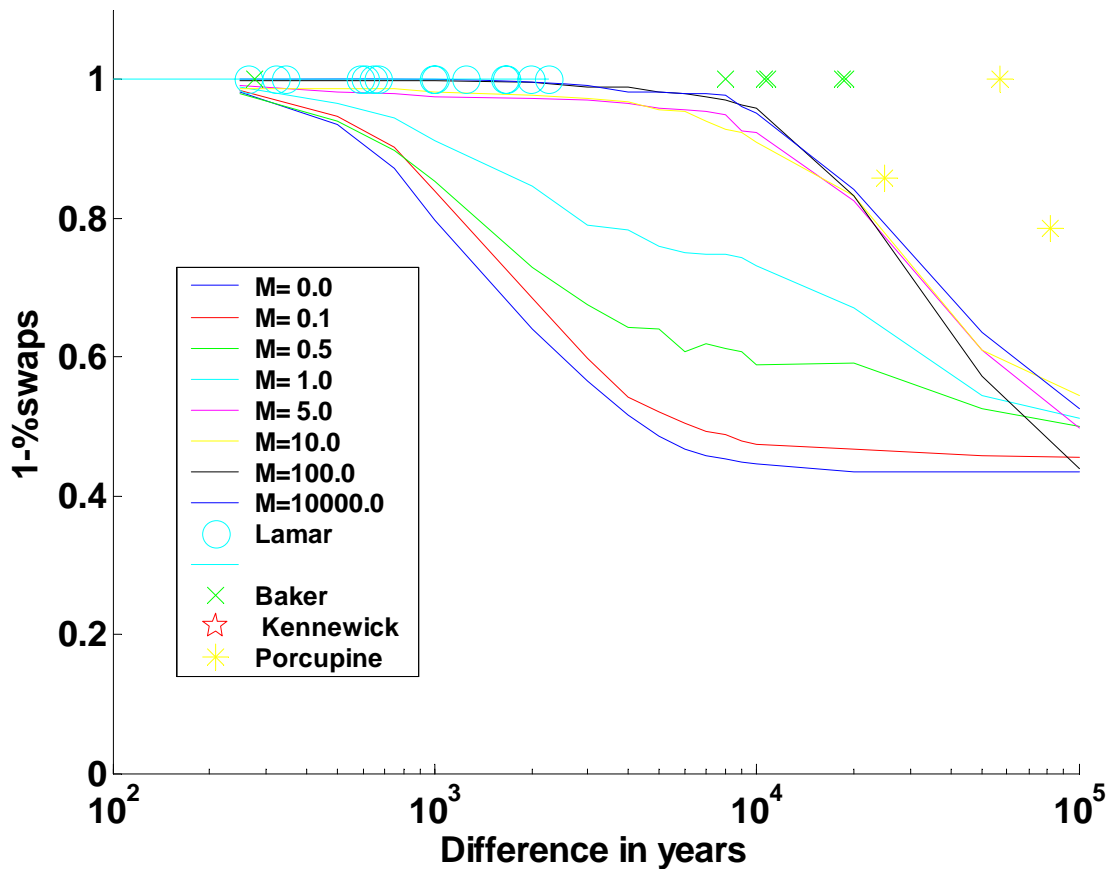

Supplement: pnas_0504225102_3.pdf [file pnas_0504225102_3.pdf]
